# Supplementary material
Source: MDPI journal article supplement (https://www.mdpi.com/2813-0413/1/1/1)

**Figure S1.** Traffic light risk-of-bias plots for randomized (A) and non-randomized (B) included studies.

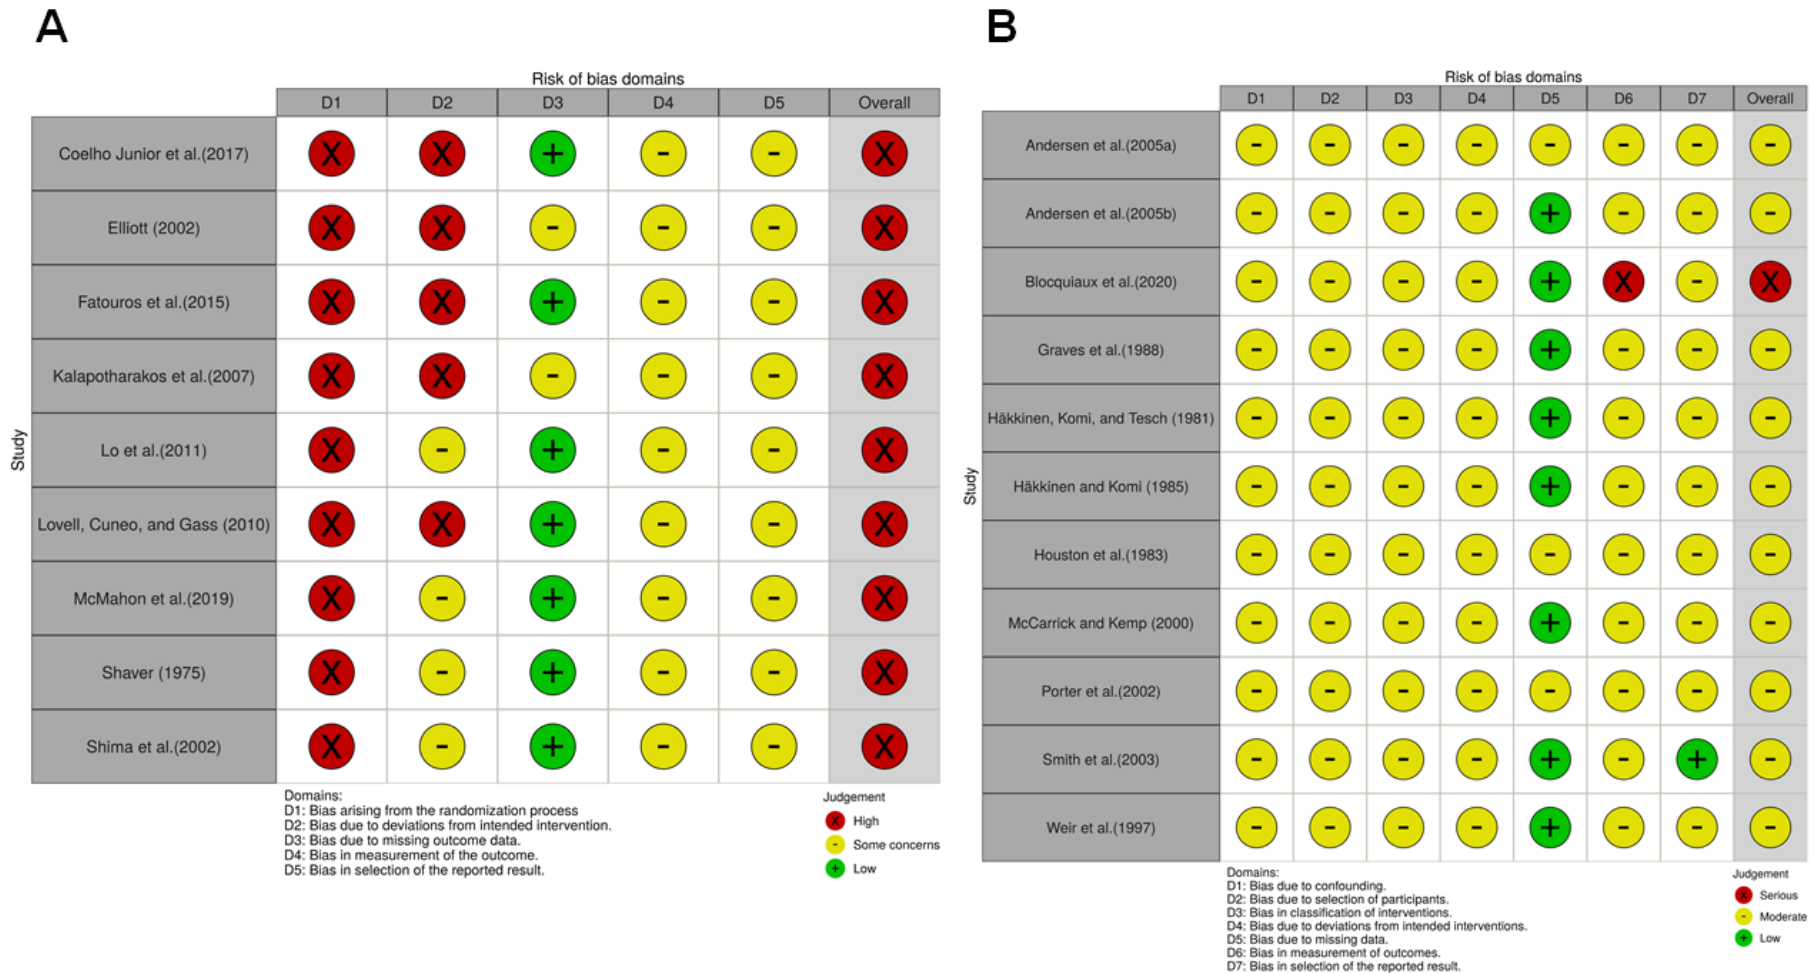

**Figure S2.** Changes in 1RM chest press strength from baseline to post-RT (A), from post-RT to post 16-24 weeks of detraining (B), and from baseline to 16-24 weeks of detraining (C).

**A**

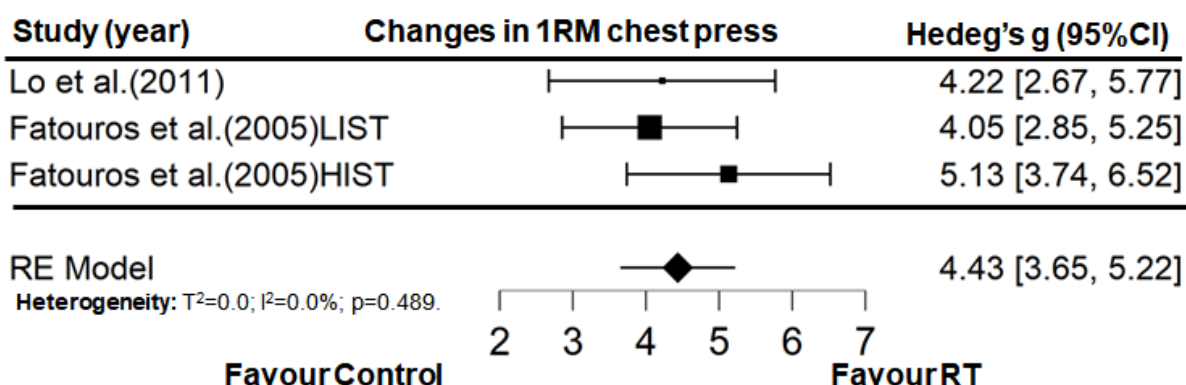

**B**

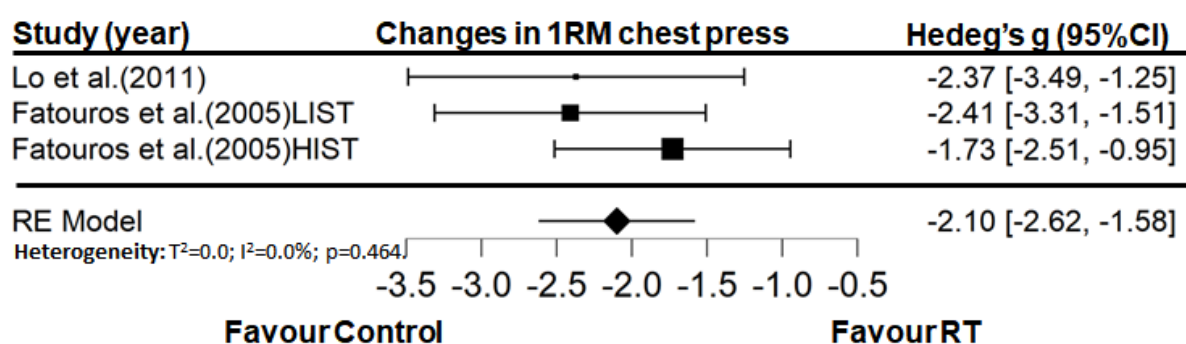

**C**

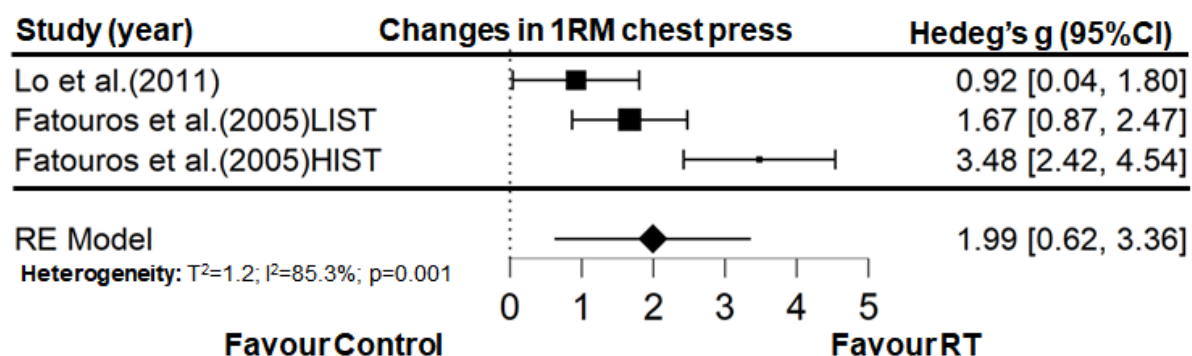

**Figure S3.** Changes in 1RM leg press strength from baseline to post-RT (A), from post-RT to post 16-24 weeks of detraining (B), and from baseline to 16-24 weeks of detraining (C).

**A**

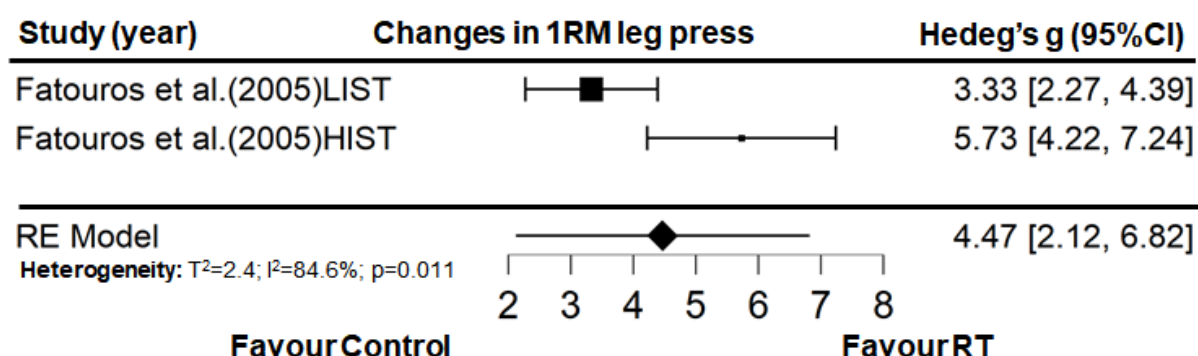

**B**

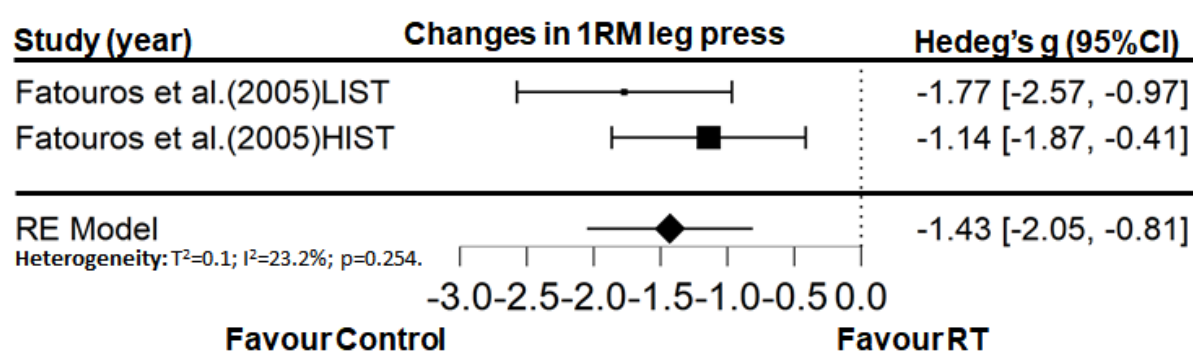

**C**

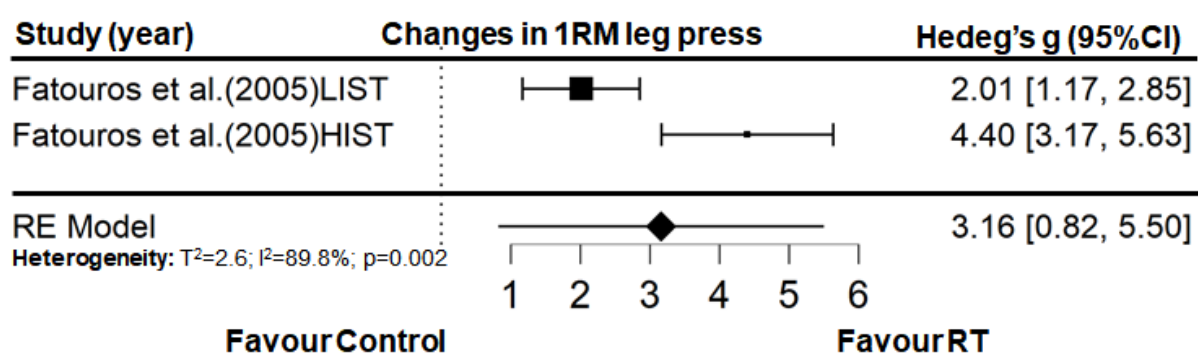

**Figure S4.** Changes in 1RM chest press strength from baseline to post-RT (A), from post-RT to post 32 weeks of detraining (B), and from baseline to 32 weeks of detraining (C).

**A**

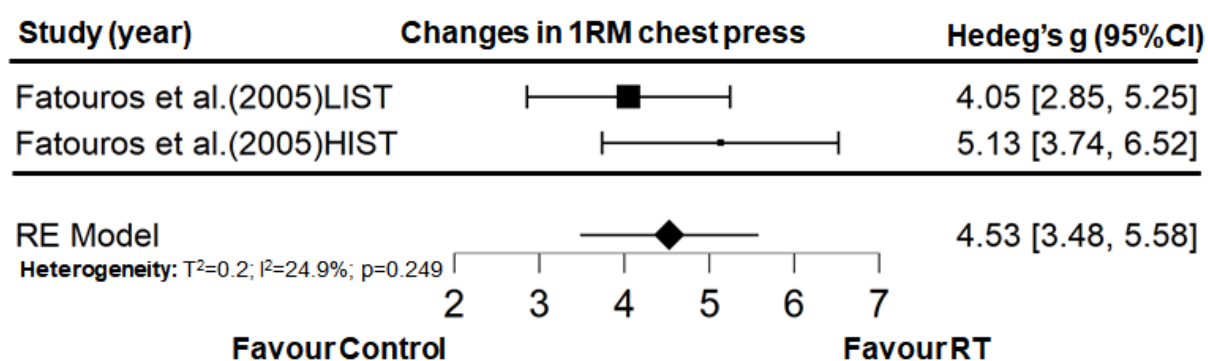

**B**

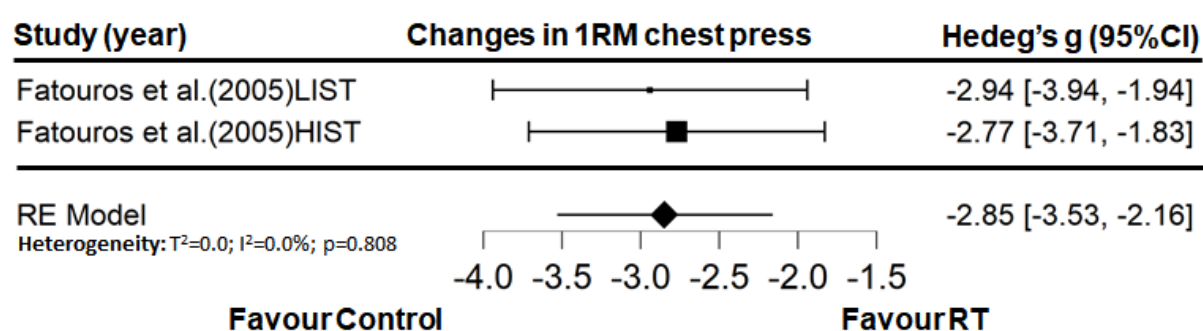

**C**

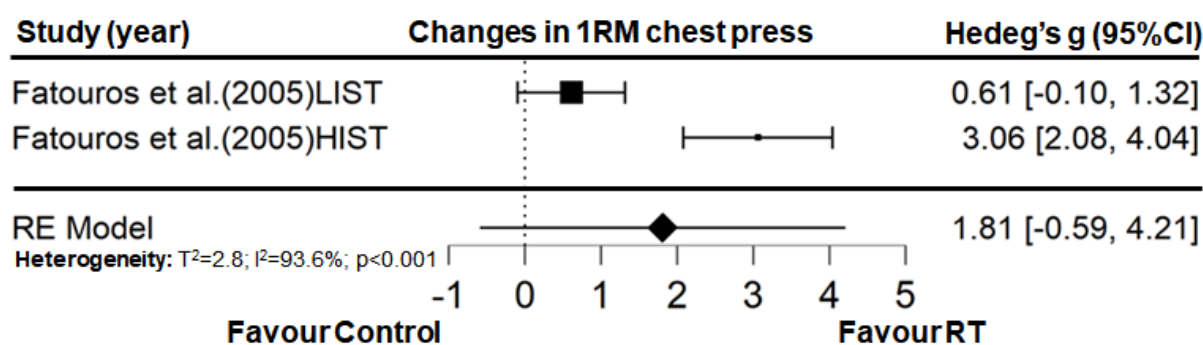

**Figure S5.** Changes in 1RM leg press strength from baseline to post-RT (A), from post-RT to post 32 weeks of detraining (B), and from baseline to 32 weeks of detraining (C).

**A**

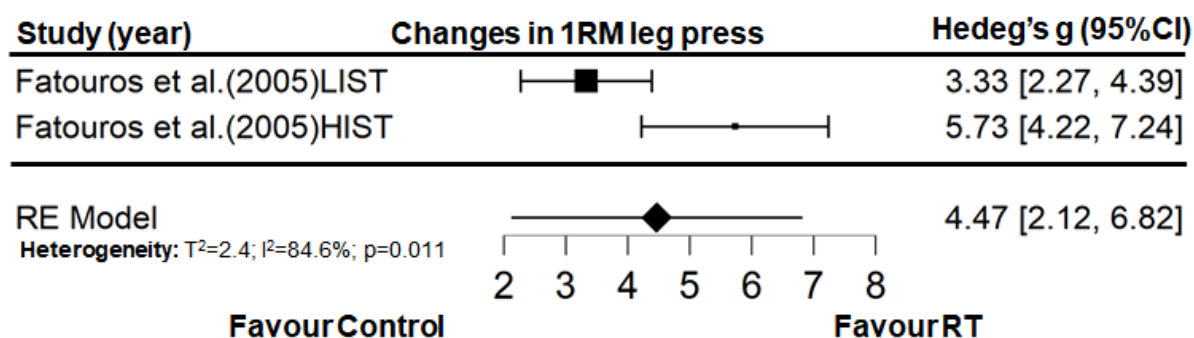

**B**

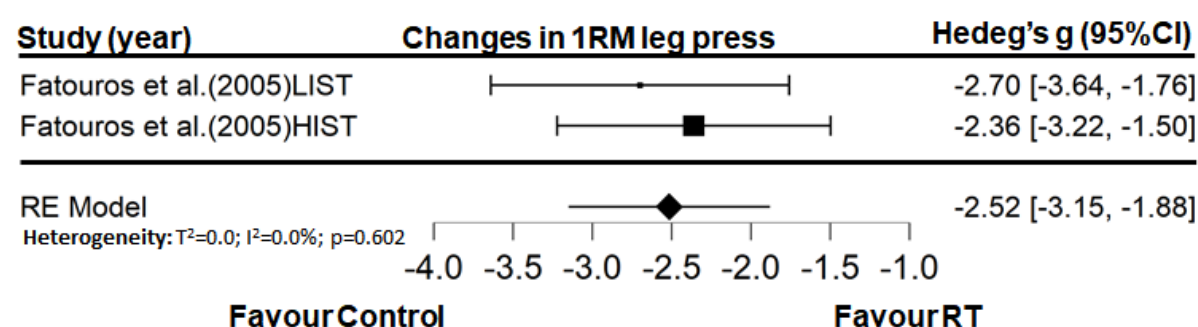

**C**

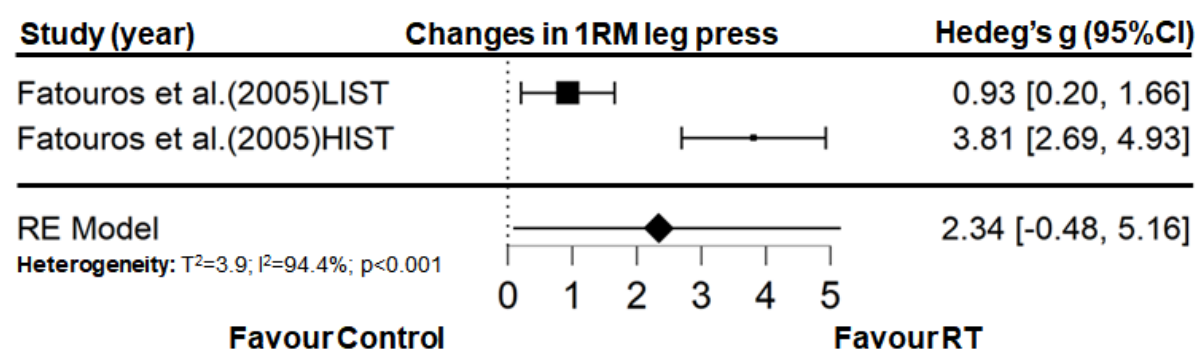

**Figure S6.** Changes in 1RM chest press strength from baseline to post-RT (A), from post-RT to post 48 weeks of detraining (B), and from baseline to 48 weeks of detraining (C).

**A**

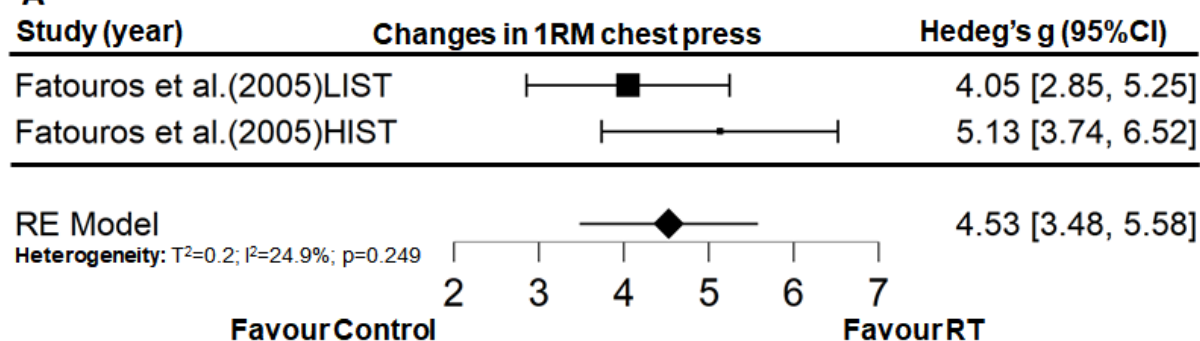

**B**

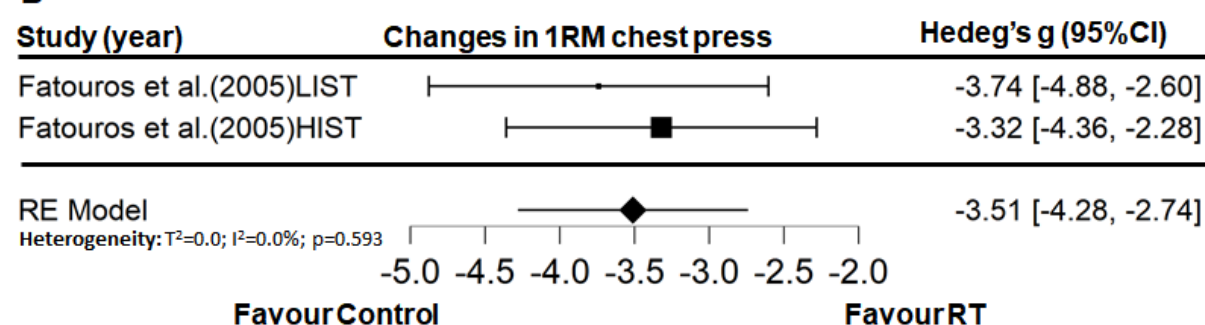

**C**

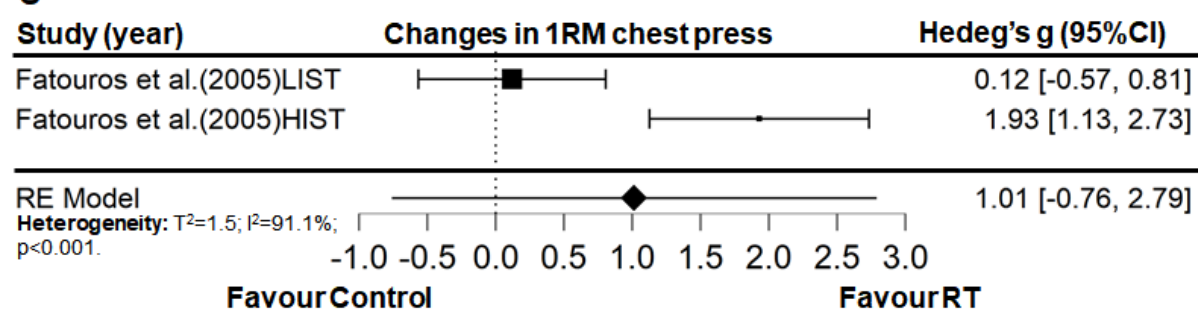

**Figure S7.** Changes in 1RM leg press strength from baseline to post-RT (A), from post-RT to post 48 weeks of detraining (B), and from baseline to 48 weeks of detraining (C).

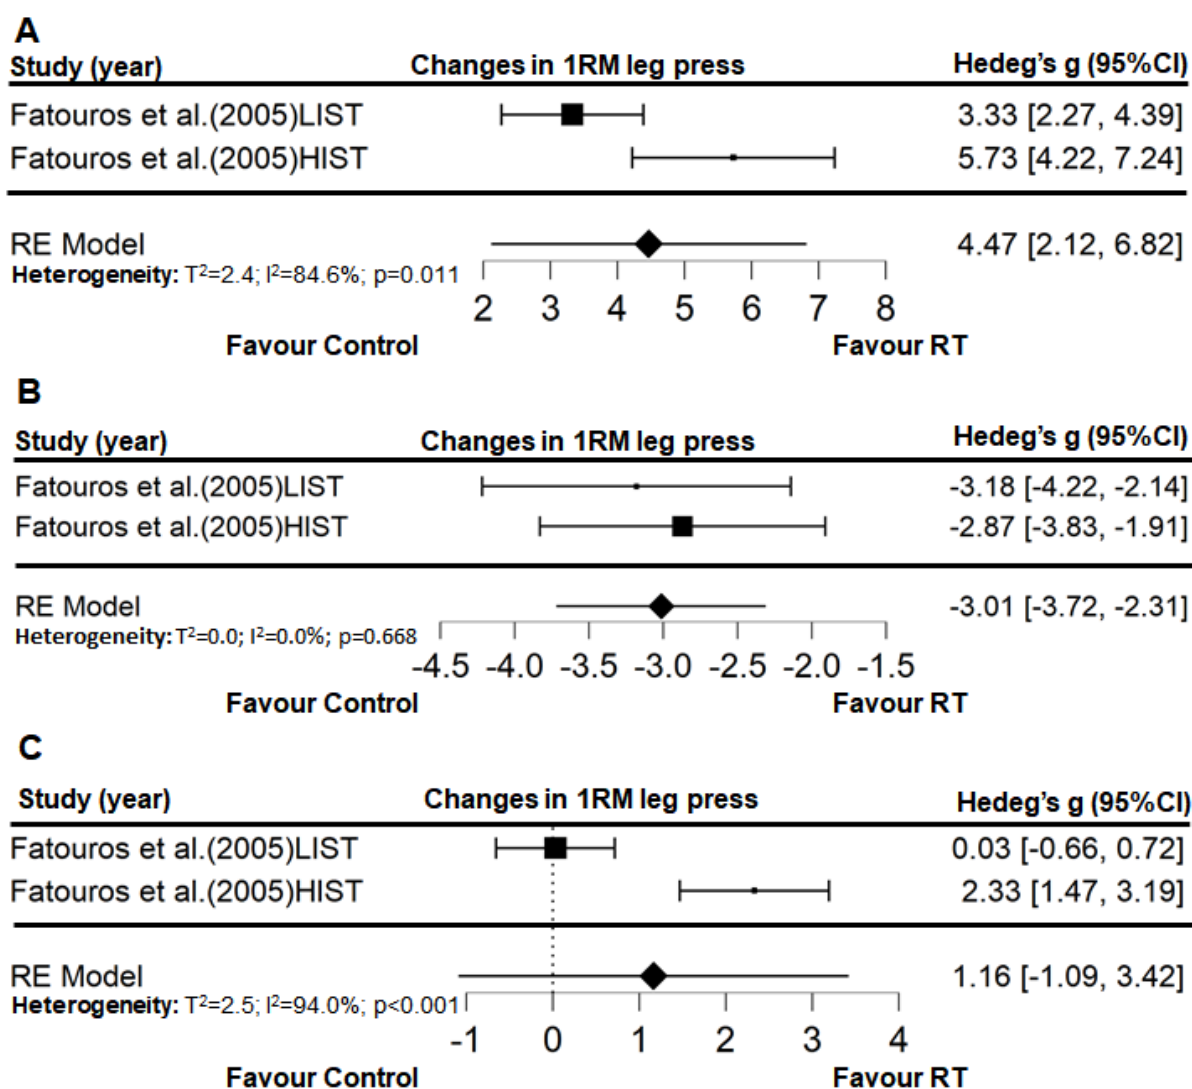

**Figure S8.** Funnel plots for all meta-analyses performed.

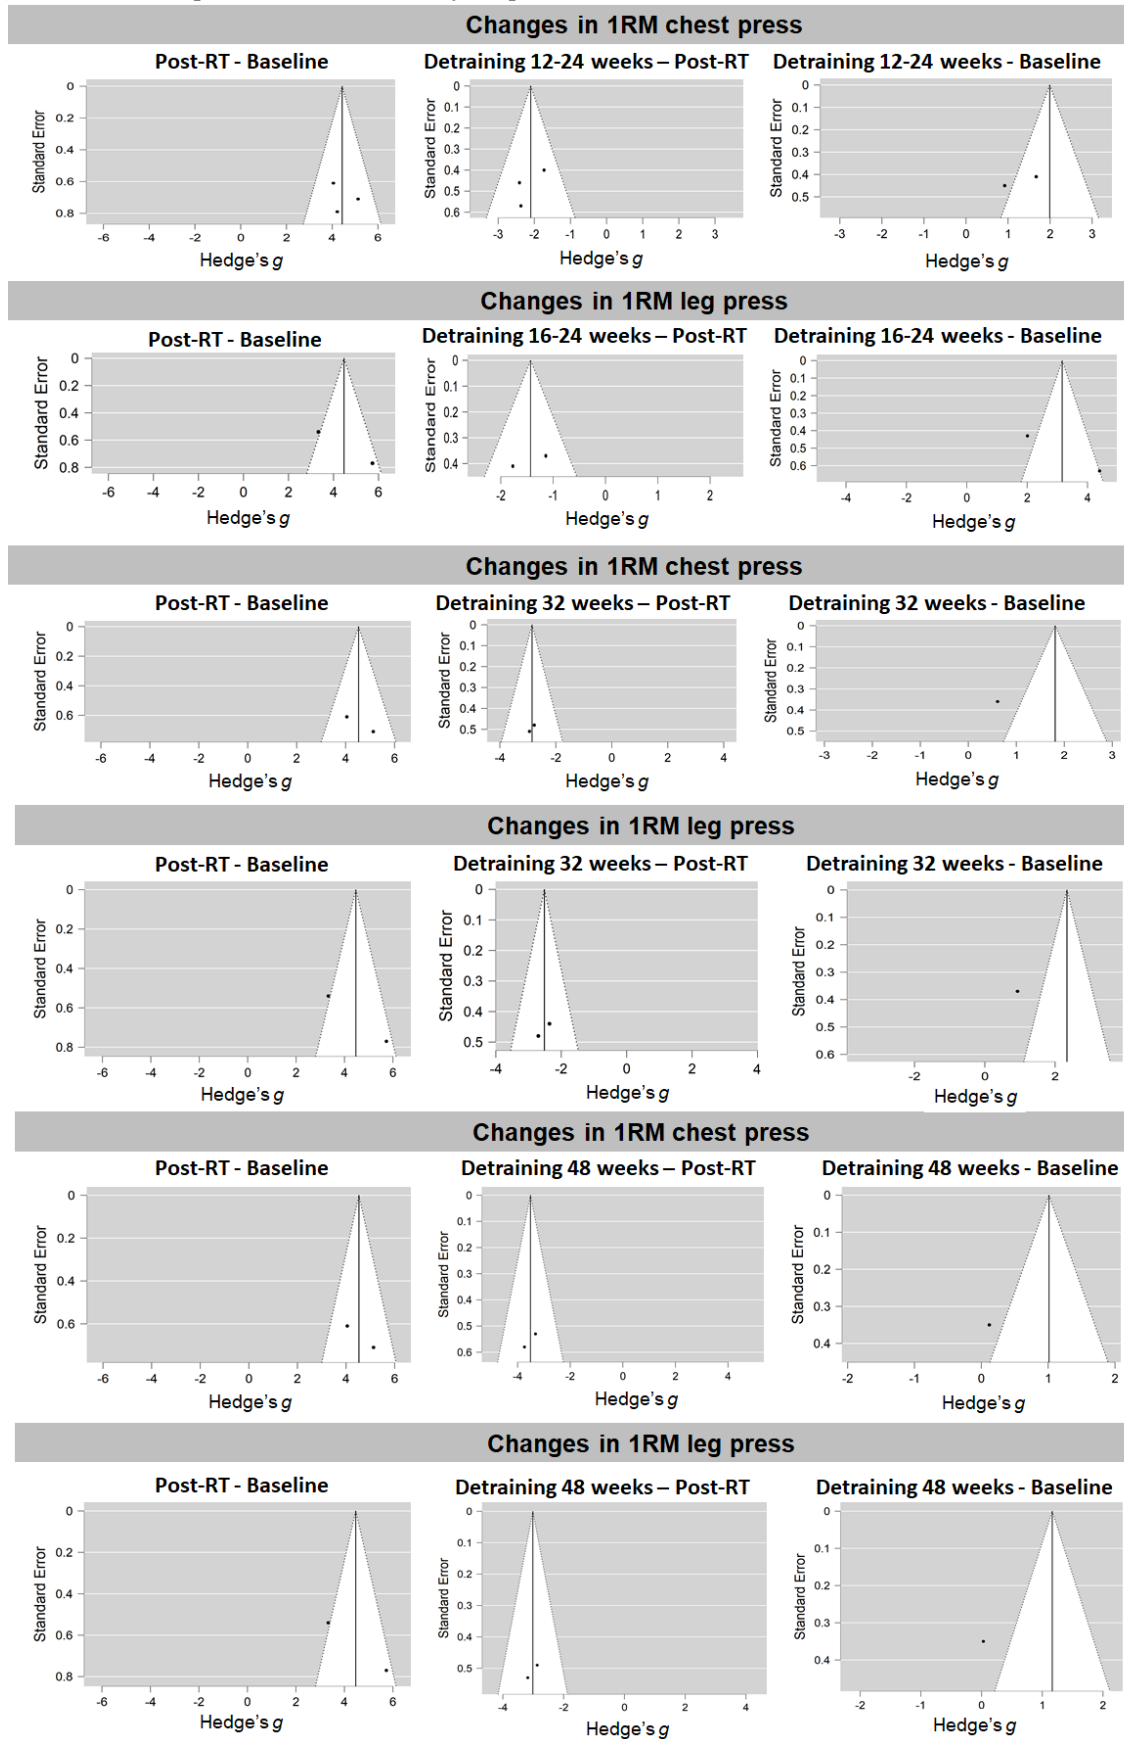

Supplement: s1 [file s1]
